# Supplementary material for: Optically and magnetically doped ormosil nanoparticles for bioimaging: synthesis, characterization, and in vitro studies
Source: Royal Society of Chemistry journal article supplement (doi:10.1039/c4ra00331d), 2014-01-01
Supplement: c4ra00331d1.pdf [file c4ra00331d1.pdf]

**Optically and magnetically doped ormosil nanoparticles for bioimaging:  
synthesis, characterization, and *in vitro* studies.**

Pramod Kumar, Anuradha, and Indrajit Roy

*Department of Chemistry, University of Delhi, Delhi-110007, India.*

*Phone: +91-9560721851*

*E-mail: indrajitroy11@gmail.com*

**Enclosure: Two figures**

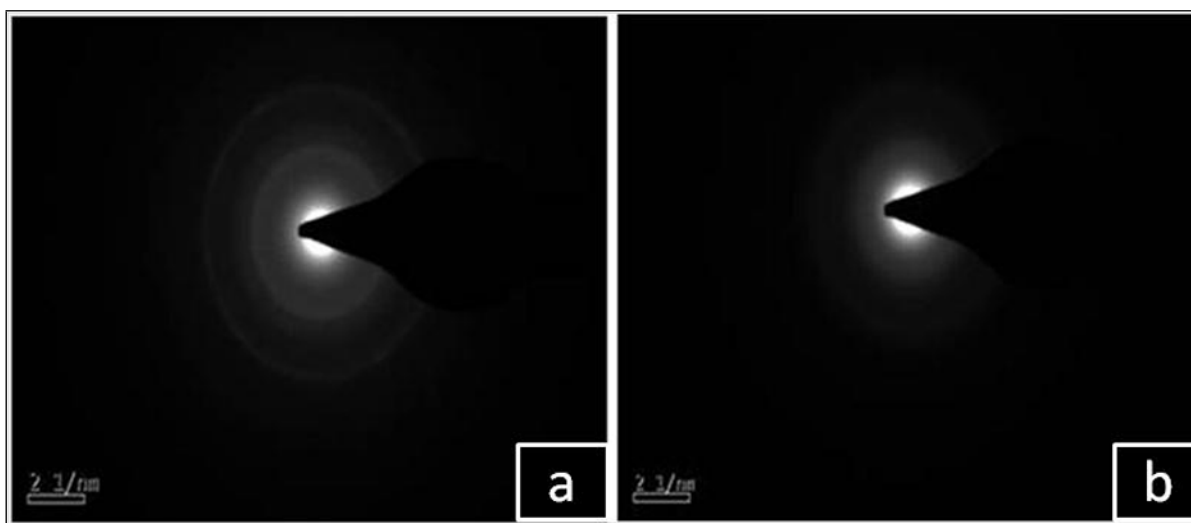

**Fig. S1:** Selected area electron diffraction (SAED) pattern of (a) free iron oxide nanoparticles (IO), and (b) ormosil nanoparticles encapsulating iron-oxide nanoparticles (IO/ORM). The clear diffraction rings visible in (a) appear to be diminished in (b).

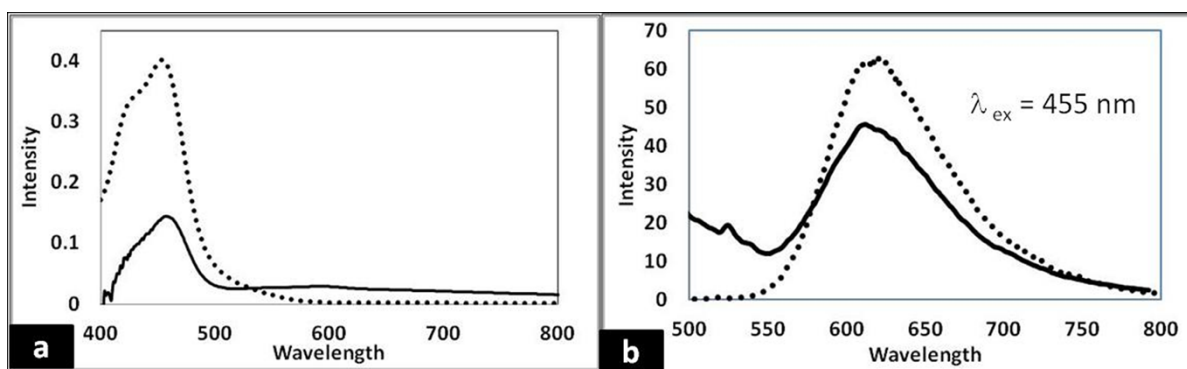

**Fig. S2:** Absorption (a) and fluorescence (b) spectra of fluorophore ruthenium-tris(2,2'-bipyridyl) dichloride (RU), free (broken line) and co-encapsulated with iron-oxide (IO) within ormosil nanoparticles (solid line). The results show that the optical features of the fluorophore are retained, but diminished, upon nanoencapsulation.
